# Supplementary material for: Small RNA sX13: A Multifaceted Regulator of Virulence in the Plant Pathogen Xanthomonas
Source: PLOS journal article supplement (doi:10.1371/journal.ppat.1003626), 2013-09-12
Supplement: S10 (10.1371/journal.ppat.1003626.s010) [file journal.ppat.1003626.s010]

**Table S2. sX13-regulated genes identified by microarray and qRT-PCR analysis.**

| Locus <sup>a</sup>                                        | Annotated gene product <sup>b</sup>                                     | 4G-motif <sup>c</sup> | Microarray Fold-change ( $\Delta$ sX13 / wt) <sup>d</sup> |     | qRT-PCR Fold-change ( $\Delta$ sX13 / wt) <sup>e</sup> |             |
|-----------------------------------------------------------|-------------------------------------------------------------------------|-----------------------|-----------------------------------------------------------|-----|--------------------------------------------------------|-------------|
|                                                           |                                                                         |                       | NYG                                                       | MMA | NYG                                                    | MMA         |
| <b>Upregulated genes (<math>\Delta</math>sX13 / wt)</b>   |                                                                         |                       |                                                           |     |                                                        |             |
| XCV0678                                                   | AlgR; two-component system regulatory protein                           | a,a,a                 | 1.8                                                       | —   | 2.5 ± 0.23                                             | n.t.        |
| XCV0730                                                   | Prc; tail-specific protease                                             | —                     | —                                                         | 1.6 | n.t.                                                   | n.t.        |
| XCV0950                                                   | conserved hypothetical protein                                          | a,a                   | 1.6                                                       | —   | n.t.                                                   | n.t.        |
| XCV1274                                                   | putative secreted protein                                               | a                     | —                                                         | 2.7 | n.t.                                                   | n.t.        |
| <b>XCV1528</b>                                            | putative secreted protein                                               | —                     | —                                                         | 1.8 | n.t.                                                   | n.t.        |
| <b>XCV1626</b>                                            | peptidyl-prolyl cis-trans isomerase                                     | —                     | —                                                         | 1.6 | n.t.                                                   | n.t.        |
| <b>XCV1768</b>                                            | Hfq; host factor-I protein                                              | b                     | 1.6                                                       | —   | 2.4 ± 0.08                                             | 1.6 ± 0.31  |
| XCV2041                                                   | putative signal transduction protein                                    | a                     | —                                                         | 1.9 | n.t.                                                   | n.t.        |
| XCV2185                                                   | conserved hypothetical protein                                          | —                     | 3.7                                                       | —   | n.t.                                                   | n.t.        |
| XCV2186                                                   | methyl-accepting chemotaxis protein                                     | a                     | 7.7                                                       | —   | 2.1 ± 0.34                                             | 10.2 ± 4.63 |
| XCV2302                                                   | conserved hypothetical protein                                          | —                     | 1.5                                                       | 1.6 | n.t.                                                   | n.t.        |
| XCV2341                                                   | conserved hypothetical protein                                          | —                     | —                                                         | 1.5 | n.t.                                                   | n.t.        |
| XCV2357                                                   | conserved hypothetical protein                                          | —                     | 1.7                                                       | —   | n.t.                                                   | n.t.        |
| <b>XCV2499</b>                                            | putative membrane protein                                               | a,b                   | 2.0                                                       | —   | n.t.                                                   | n.t.        |
| XCV2565                                                   | conserved hypothetical protein                                          | b                     | —                                                         | 1.6 | n.t.                                                   | n.t.        |
| <b>XCV2608</b>                                            | type IV secretion system VirJ-like protein                              | b                     | 1.7                                                       | 2.5 | n.t.                                                   | n.t.        |
| XCV2814                                                   | PilE; type IV pilus pilin                                               | —                     | 2.8                                                       | —   | 3.3 ± 0.36                                             | n.t.        |
| <b>XCV2815</b>                                            | type IV pilus adhesin                                                   | b                     | 2.1                                                       | —   | n.t.                                                   | n.t.        |
| XCV2819                                                   | type IV pilus assembly protein PilW                                     | a                     | 3.7                                                       | 4.0 | 3.4 ± 0.37                                             | 5.5 ± 3.0   |
| <b>XCV2820</b>                                            | type IV pilus assembly protein PilV                                     | a                     | 2.9                                                       | —   | n.t.                                                   | n.t.        |
| <b>XCV2821</b>                                            | type IV pilus assembly protein FimT                                     | a                     | 4.3                                                       | 7.4 | 4.2 ± 0.32                                             | 3.4 ± 1.27  |
| XCV2917                                                   | hypothetical protein                                                    | —                     | 2.9                                                       | —   | n.t.                                                   | n.t.        |
| XCV3059                                                   | putative secreted protein                                               | b                     | —                                                         | 2.1 | n.t.                                                   | n.t.        |
| XCV3067                                                   | PilU; type IV pilus assembly protein ATPase                             | a                     | 1.8                                                       | —   | 1.7 ± 0.29                                             | n.t.        |
| <b>XCV3096</b>                                            | ComEA-related DNA uptake protein                                        | —                     | —                                                         | 4.2 | n.t.                                                   | 1.9 ± 0.12  |
| XCV3151                                                   | hypothetical protein                                                    | b,b                   | —                                                         | 1.6 | n.t.                                                   | n.t.        |
| XCV3230                                                   | PilJ; type IV pilus methyl-accepting chemotaxis protein                 | a                     | 2.2                                                       | —   | n.t.                                                   | n.t.        |
| <b>XCV3233</b>                                            | PilG; type IV pilus response regulator                                  | a,b                   | —                                                         | 2.0 | 2.3 ± 0.26                                             | 4.1 ± 1.71  |
| <b>XCV3353</b>                                            | PilA; type IV pilus assembly protein, major pilin                       | a                     | —                                                         | 2.9 | n.t.                                                   | n.t.        |
| XCV3371                                                   | conserved hypothetical protein                                          | a,b                   | —                                                         | 1.8 | n.t.                                                   | n.t.        |
| <b>XCV3376</b>                                            | hypothetical protein                                                    | —                     | 2.0                                                       | —   | n.t.                                                   | n.t.        |
| XCV3497                                                   | PilQ; type IV pilus assembly protein                                    | a,b                   | —                                                         | 1.6 | n.t.                                                   | n.t.        |
| XCV3498                                                   | PilP; type IV pilus assembly protein                                    | —                     | 2.5                                                       | —   | n.t.                                                   | n.t.        |
| XCV3499                                                   | PilO; type IV pilus assembly protein                                    | a                     | 2.4                                                       | —   | n.t.                                                   | n.t.        |
| <b>XCV3500</b>                                            | PilN; type IV pilus assembly protein                                    | —                     | 2.7                                                       | —   | 2.7 ± 0.16                                             | n.t.        |
| XCV3629                                                   | putative amidohydrolase family protein                                  | a                     | 1.9                                                       | —   | n.t.                                                   | n.t.        |
| <b>XCV3727</b>                                            | conserved hypothetical protein                                          | a                     | —                                                         | 2.3 | n.t.                                                   | n.t.        |
| <b>XCV3730</b>                                            | type IV pilus assembly protein                                          | a,a                   | 2.0                                                       | —   | n.t.                                                   | n.t.        |
| <b>XCV3927</b>                                            | putative secreted protein                                               | a                     | —                                                         | 1.7 | 5.6 ± 0.45                                             | 8.3 ± 4.54  |
| XCV4099                                                   | conserved hypothetical protein                                          | b                     | —                                                         | 1.7 | n.t.                                                   | n.t.        |
| XCV4117                                                   | conserved hypothetical protein                                          | b                     | —                                                         | 1.5 | n.t.                                                   | n.t.        |
| <b>XCV4382</b>                                            | putative acetyltransferase                                              | —                     | —                                                         | 1.5 | n.t.                                                   | n.t.        |
| <b>Downregulated genes (<math>\Delta</math>sX13 / wt)</b> |                                                                         |                       |                                                           |     |                                                        |             |
| <b>XCV0227</b>                                            | hypothetical protein                                                    | —                     | 0.4                                                       | —   | n.t.                                                   | n.t.        |
| XCV0588                                                   | putative secreted protein; Ycel-like family                             | —                     | 0.5                                                       | —   | n.t.                                                   | n.t.        |
| XCV1188                                                   | conserved hypothetical protein                                          | —                     | 0.5                                                       | —   | n.t.                                                   | n.t.        |
| XCV1315                                                   | HrpX; AraC-type transcriptional regulator                               | —                     | 0.6                                                       | —   | 0.6 ± 0.01                                             | 0.7 ± 0.13  |
| XCV1787                                                   | predicted ATPase related to phosphate starvation-inducible protein PhoH | —                     | 0.6                                                       | —   | n.t.                                                   | n.t.        |
| XCV1945                                                   | methyl-accepting chemotaxis protein                                     | —                     | 0.5                                                       | —   | n.t.                                                   | n.t.        |
| XCV1956                                                   | CheA1; chemotaxis protein                                               | —                     | 0.6                                                       | —   | n.t.                                                   | n.t.        |
| XCV1957                                                   | CheY; chemotaxis response regulator                                     | —                     | 0.4                                                       | —   | 0.1 ± 0.04                                             | n.t.        |
| XCV1958                                                   | putative anti-sigma factor antagonist                                   | —                     | 0.4                                                       | —   | n.t.                                                   | n.t.        |
| XCV2021                                                   | FliD; flagellar capping protein                                         | —                     | 0.7                                                       | —   | n.t.                                                   | n.t.        |
| <b>XCV2022</b>                                            | FliC; flagellin and related hook-associated proteins                    | —                     | 0.2                                                       | —   | 0.06 ± 0.03                                            | 1.0 ± 0.39  |
| XCV2037                                                   | conserved hypothetical protein                                          | —                     | 0.3                                                       | —   | n.t.                                                   | n.t.        |
| XCV2276                                                   | hypothetical protein                                                    | b                     | 0.6                                                       | —   | n.t.                                                   | n.t.        |
| XCV2282                                                   | conserved hypothetical protein                                          | —                     | 0.6                                                       | —   | n.t.                                                   | n.t.        |
| XCV2535                                                   | CydA; cytochrome D ubiquinol oxidase, subunit II                        | a                     | 0.3                                                       | —   | n.t.                                                   | n.t.        |
| XCV2537                                                   | putative membrane protein                                               | —                     | 0.1                                                       | —   | n.t.                                                   | n.t.        |
| <b>XCV3119</b>                                            | sigma-54 modulation protein                                             | —                     | 0.6                                                       | —   | n.t.                                                   | n.t.        |
| XCV3206                                                   | TonB-dependent outer membrane receptor                                  | —                     | 0.4                                                       | —   | n.t.                                                   | n.t.        |
| XCV3572                                                   | TonB-dependent outer membrane receptor                                  | a                     | 0.2                                                       | —   | 0.2 ± 0.04                                             | 0.9 ± 0.24  |
| <b>XCV4119</b>                                            | putative secreted protein                                               | —                     | 0.2                                                       | —   | n.t.                                                   | n.t.        |
| <b>XCVd0093</b>                                           | putative secreted protein                                               | —                     | 0.5                                                       | —   | n.t.                                                   | n.t.        |

| Locus <sup>a</sup>                        | Annotated gene product <sup>b</sup>             | 4G-motif <sup>c</sup> | Microarray Fold-change ( $\Delta sX13$ / wt) <sup>d</sup> |     | qRT-PCR Fold-change ( $\Delta sX13$ / wt) <sup>e</sup> |            |
|-------------------------------------------|-------------------------------------------------|-----------------------|-----------------------------------------------------------|-----|--------------------------------------------------------|------------|
|                                           |                                                 |                       | NYG                                                       | MMA | NYG                                                    | MMA        |
| <b>Additional genes tested by qRT-PCR</b> |                                                 |                       |                                                           |     |                                                        |            |
| XCV0173                                   | putative secreted protein                       | a,b,b,b               | —                                                         | —   | 1.9 ± 0.19                                             | 0.8 ± 0.26 |
| <b>XCV0612</b>                            | ATPase of the AAA+ class                        | a                     | —                                                         | —   | 1.0 ± 0.06                                             | 0.8 ± 0.26 |
| XCV1533                                   | AsnB2; asparagine synthase                      | b                     | —                                                         | —   | 1.0 ± 0.04                                             | 1.0 ± 0.17 |
| XCV3232                                   | PilH; type IV pilus response regulator          | a                     | —                                                         | —   | 2.2 ± 0.07                                             | 1.9 ± 0.67 |
| XCV3573                                   | putative transcriptional regulator, AraC family | a                     | —                                                         | —   | 0.2 ± 0.11                                             | n.t.       |
| XCV0324                                   | type III effector protein XopS                  | —                     | —                                                         | —   | 0.6 ± 0.05                                             | n.t.       |

<sup>a</sup>, bold letters indicate genes with known TSS [1]. <sup>b</sup>, refers to Thieme *et al.* (2005) [2]. <sup>c</sup>, presence of a 4G-motif within the 5'-UTR or 100 bp upstream of translation start codon if TSS is unknown (a) and within 100 bp downstream of the start codon (b) (see Figure S4). <sup>d</sup>, genes not detected as expressed are marked with —. <sup>e</sup>, values represent mean fold-change and standard deviation (see Figure 4); n.t. - not tested.

## References

- Schmidtke C, Findeiss S, Sharma CM, Kuhfuss J, Hoffmann S, et al. (2012) Genome-wide transcriptome analysis of the plant pathogen *Xanthomonas* identifies sRNAs with putative virulence functions. *Nucleic Acids Res* 40: 2020-2031.
- Thieme F, Koebnik R, Bekel T, Berger C, Boch J, et al. (2005) Insights into genome plasticity and pathogenicity of the plant pathogenic bacterium *Xanthomonas campestris* pv. *vesicatoria* revealed by the complete genome sequence. *J Bacteriol* 187: 7254-7266.
